# Supplementary material
Source: MDPI journal article supplement (https://www.mdpi.com/2073-4441/12/11/2973)

Supplementary Material

# The impact of Land use changes on Soil erosion in the River Basin of Miocki Potok, Montenegro

Velibor Spalevic, Goran Barovic, Dusko Vujacic, Milic Curovic, Morteza Behzadfar, Nevenka Djurovic, Branislav Dudic and Paolo Bili

## Potpec River Dam, River Lim

Google Earth, 43°31'21.2"N 19°34'37.1"E, 43.522547, 19.576981

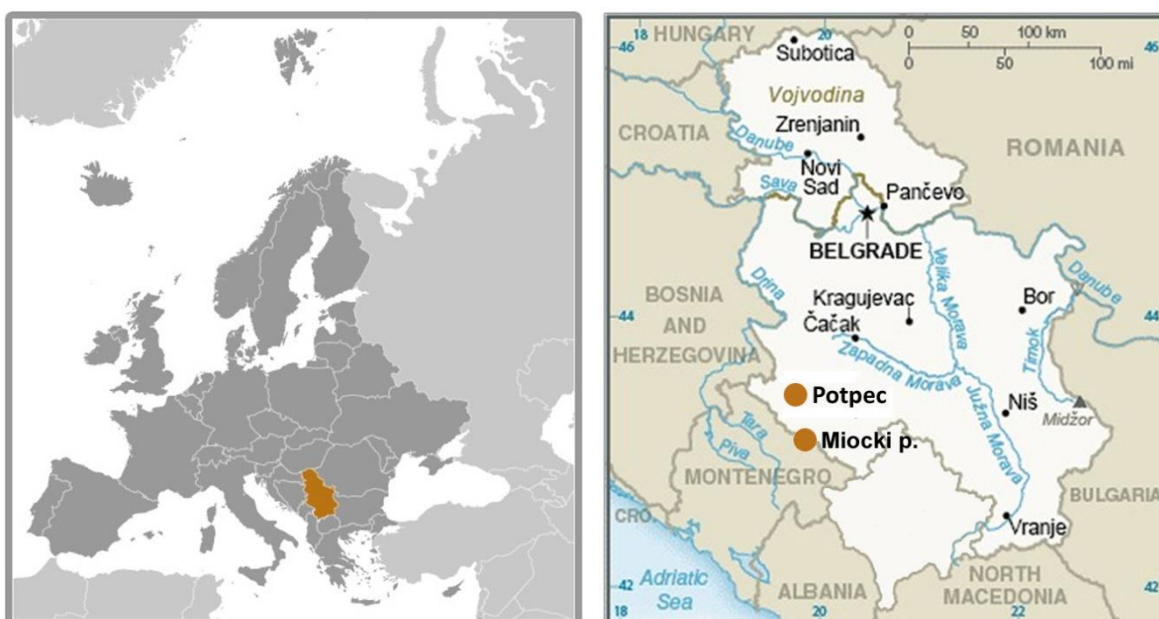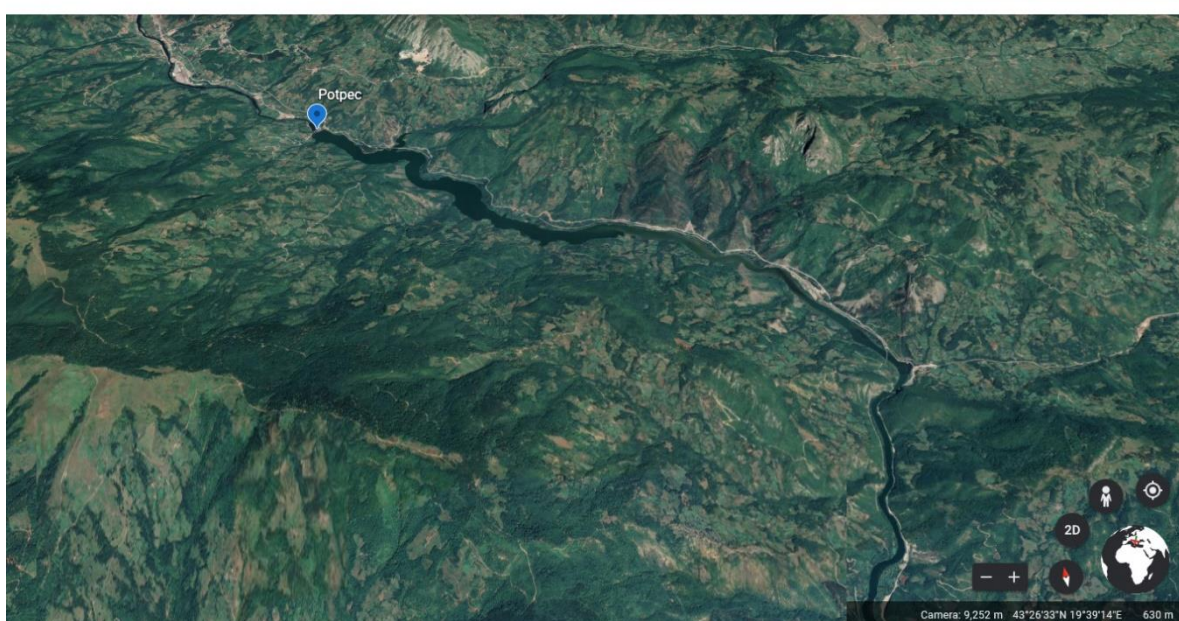

### Maps of the bathymetric profiles, Potpeć reservoir

15

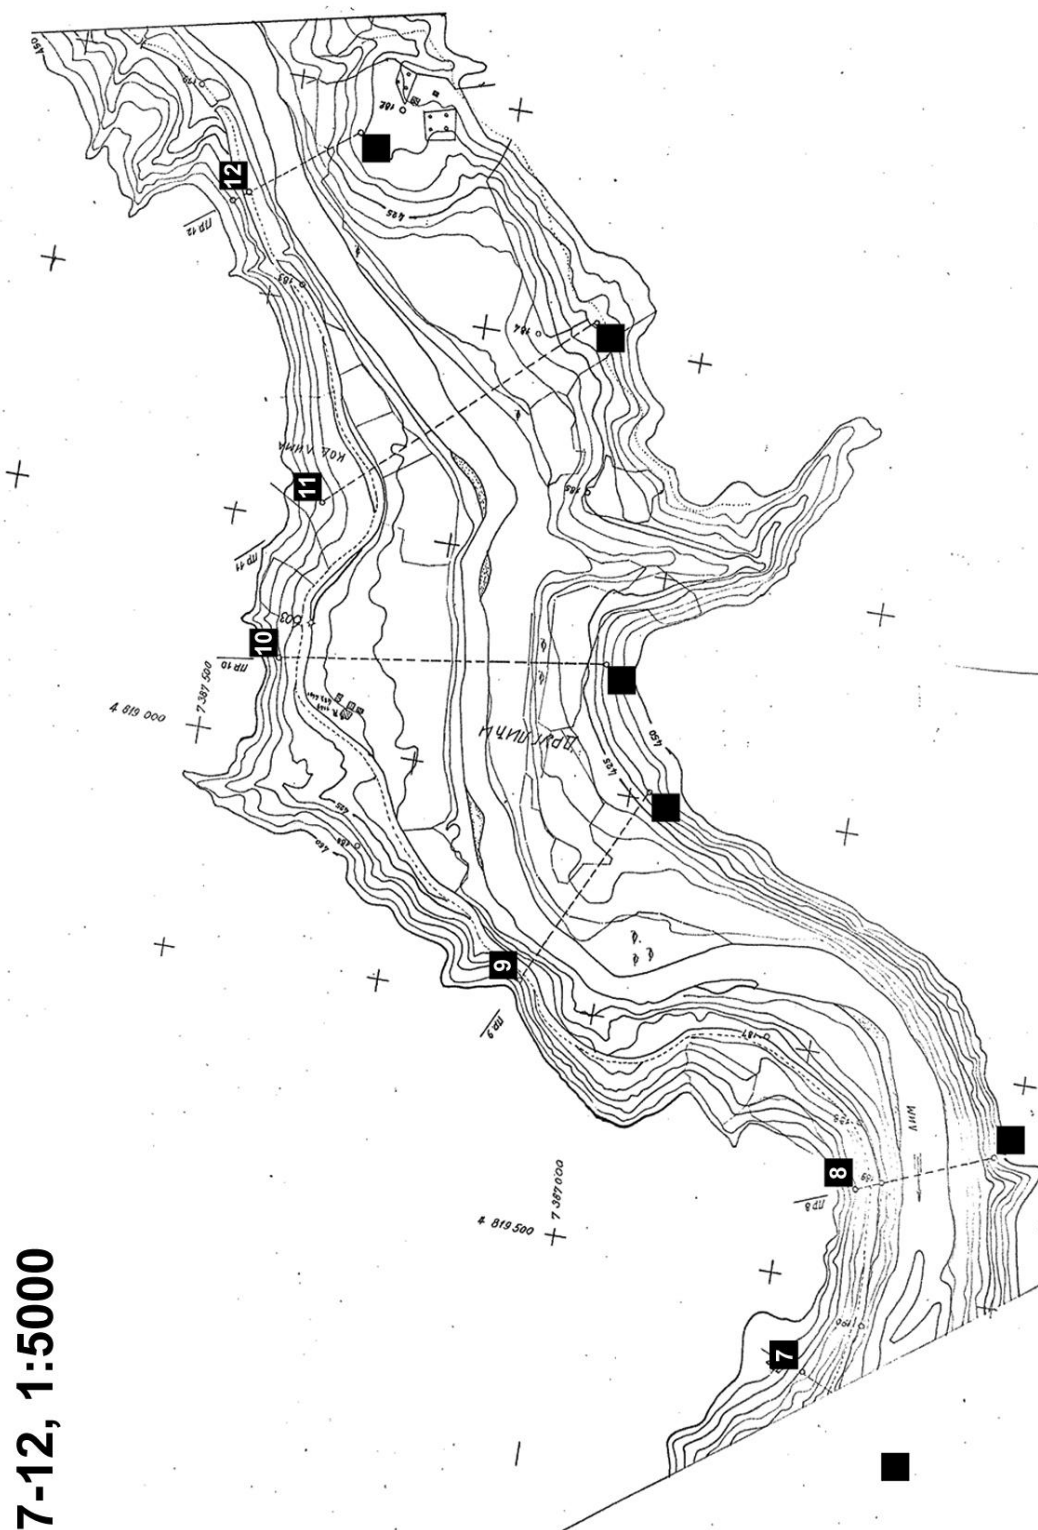

16  
17

13-18, 1-5000

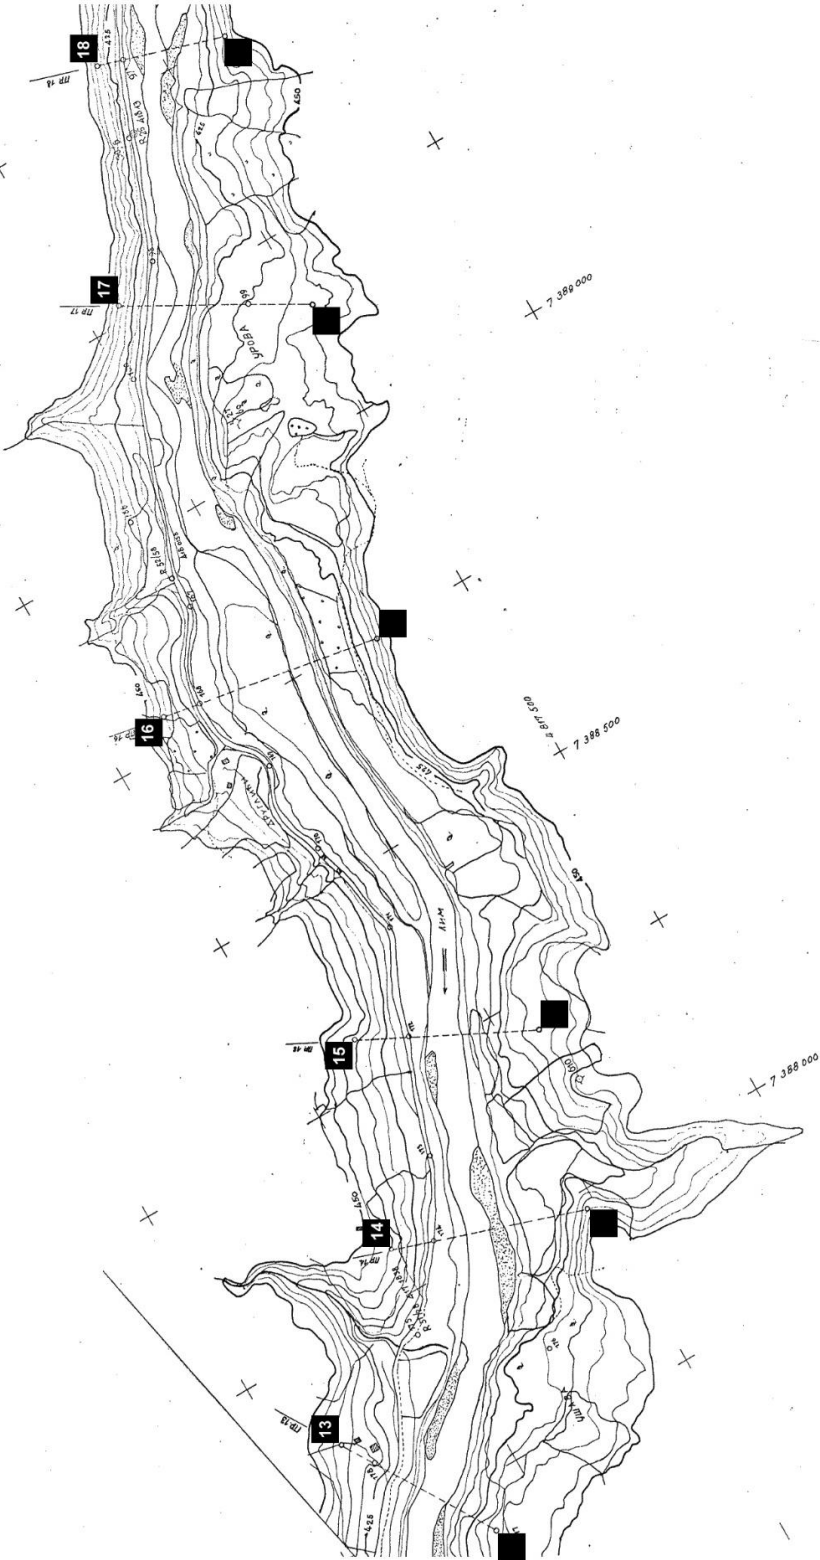

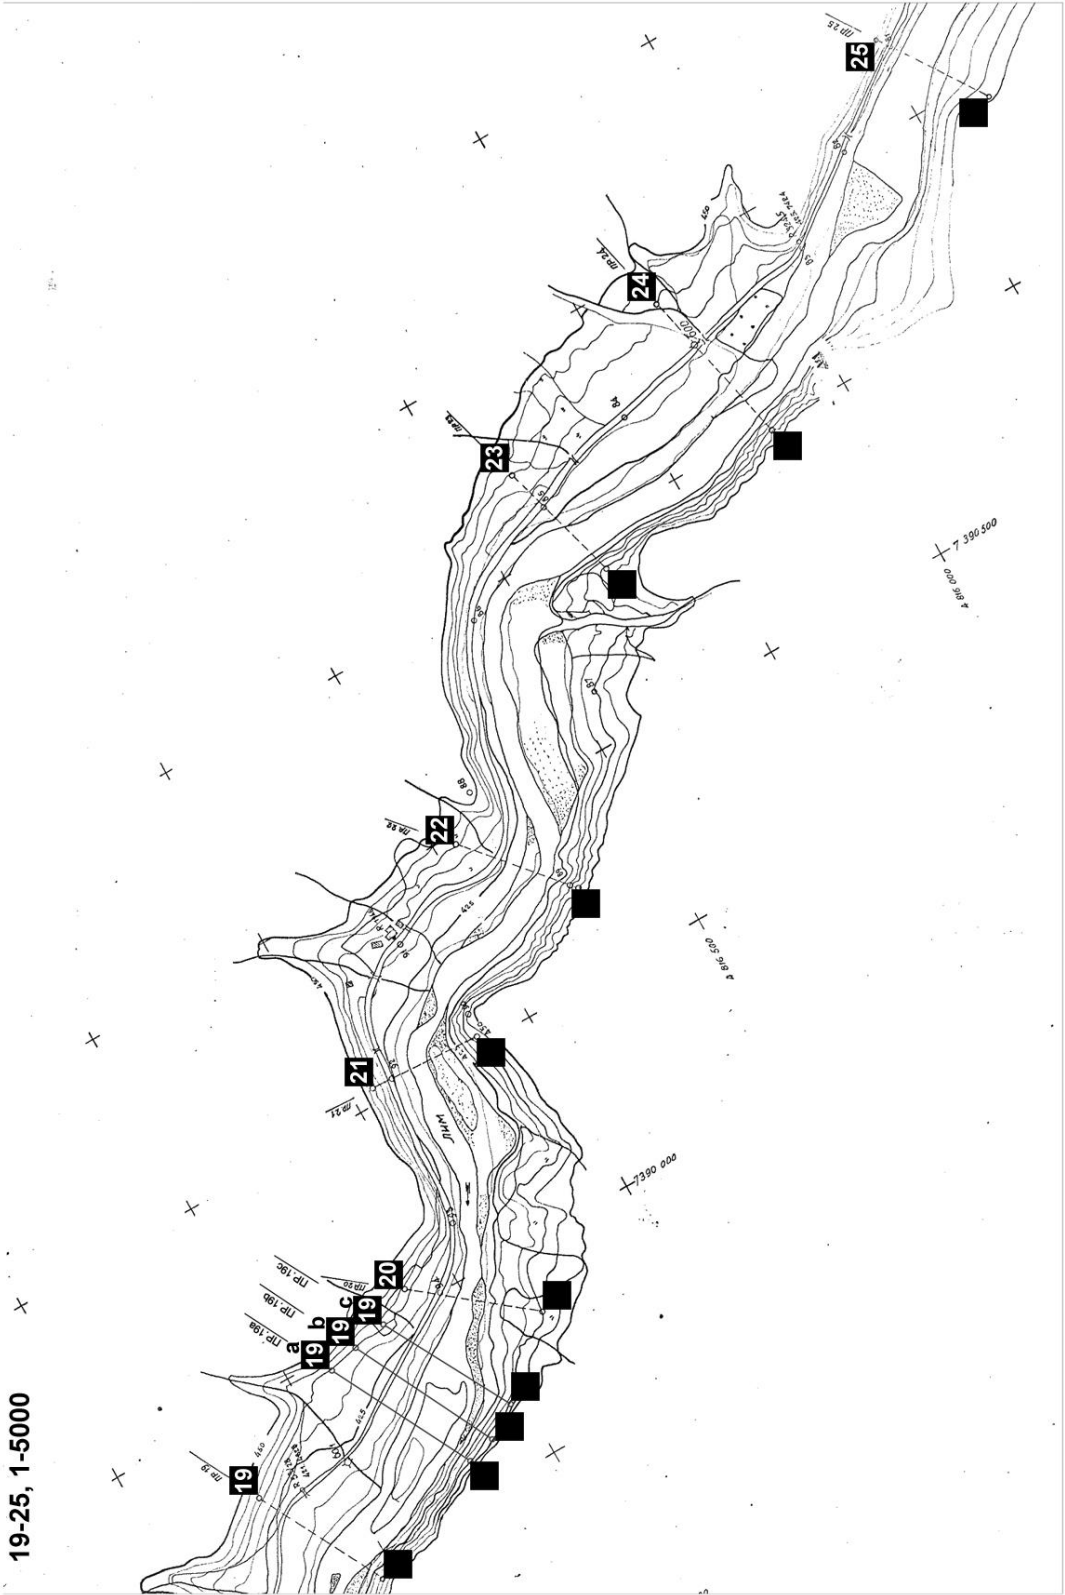

26-39, 1:5000

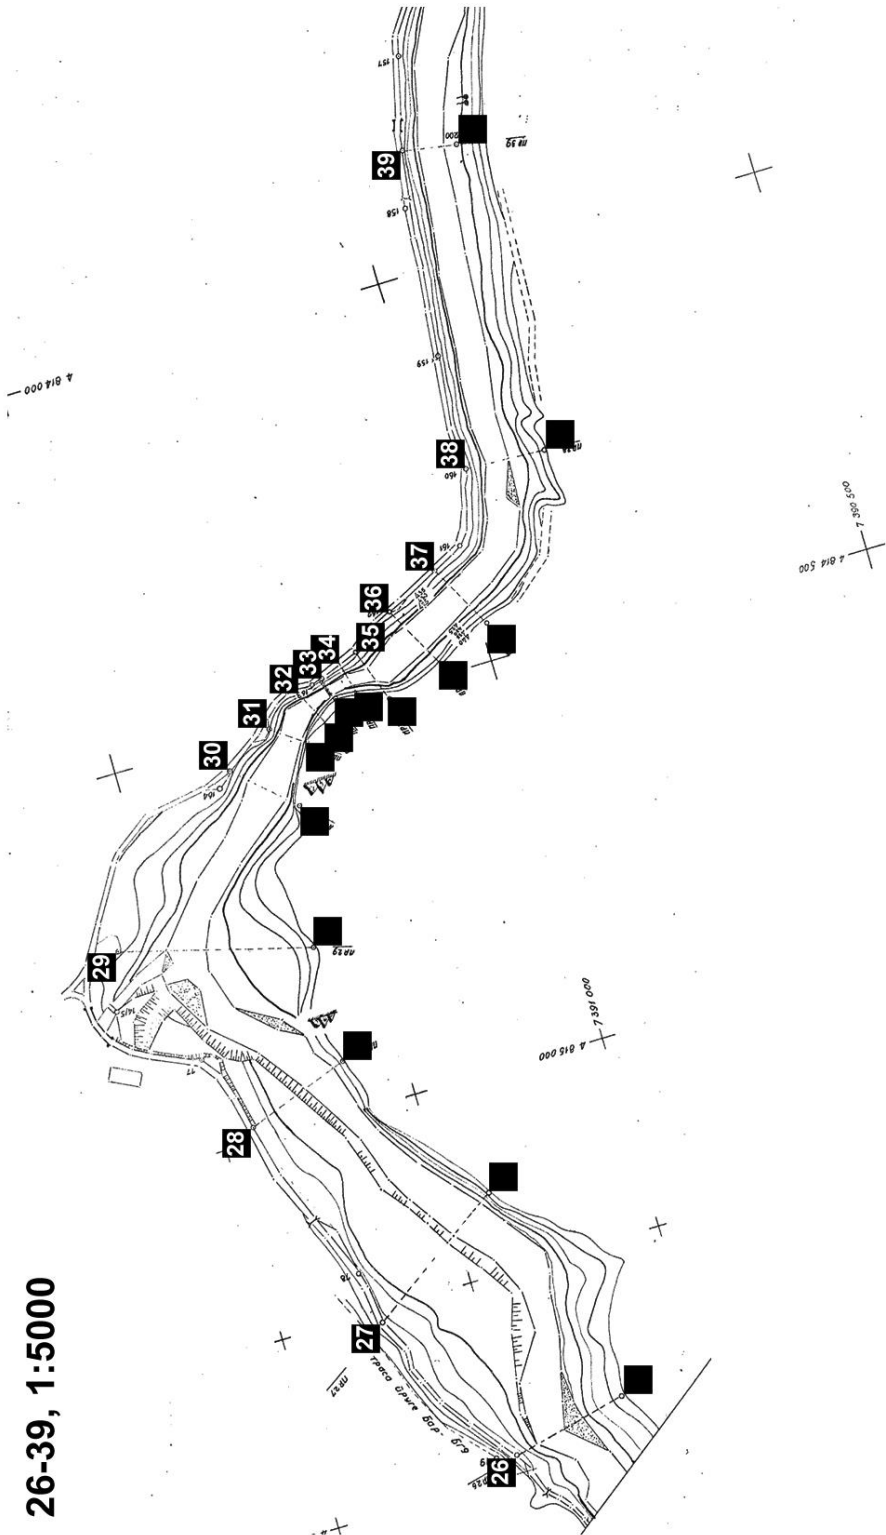

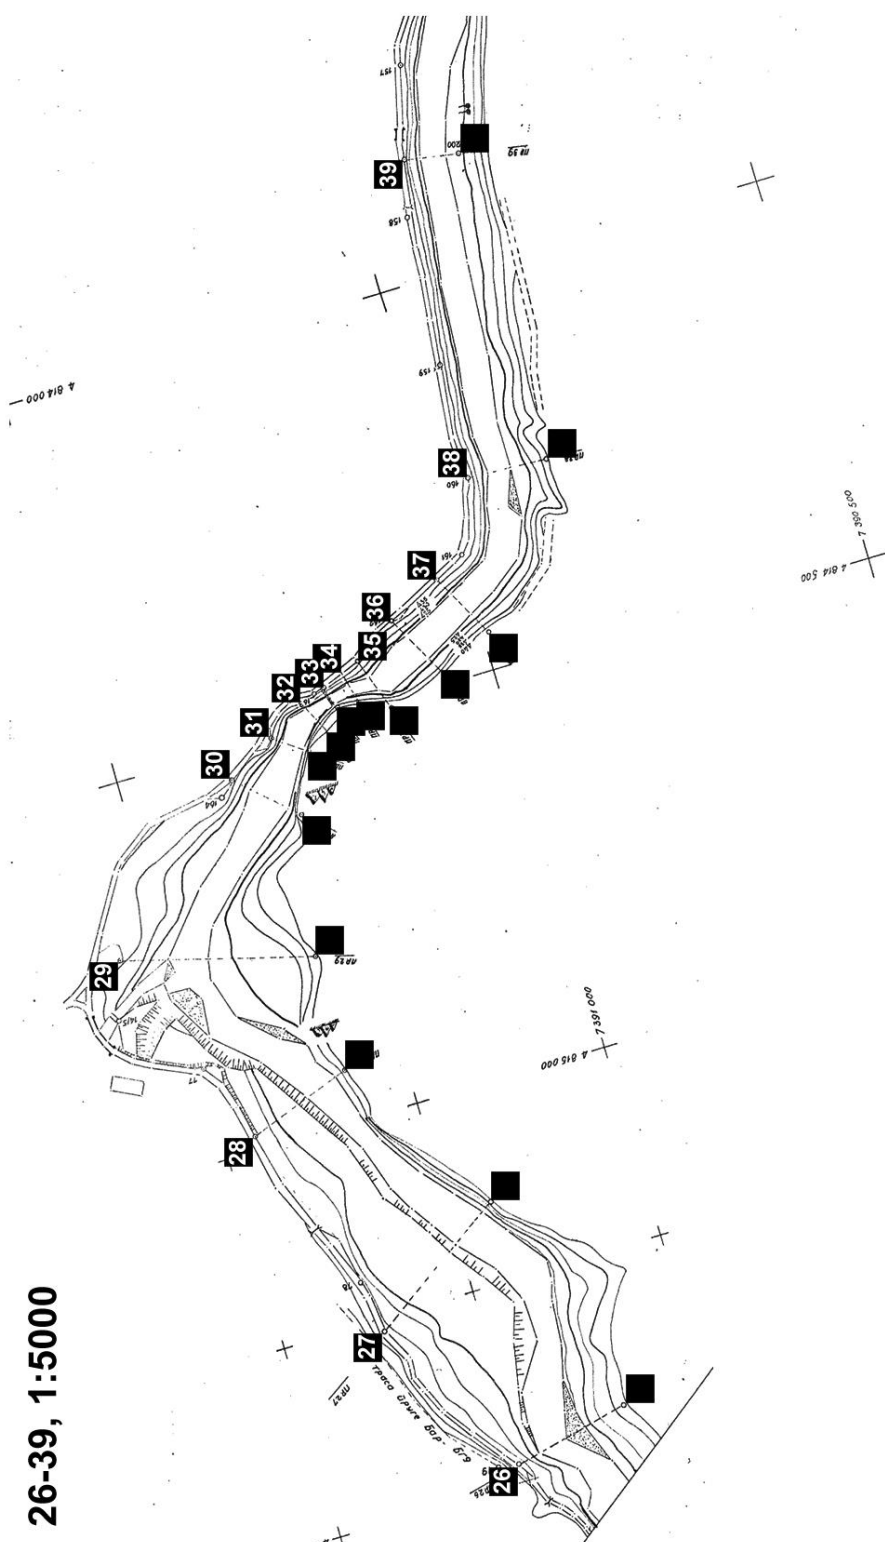

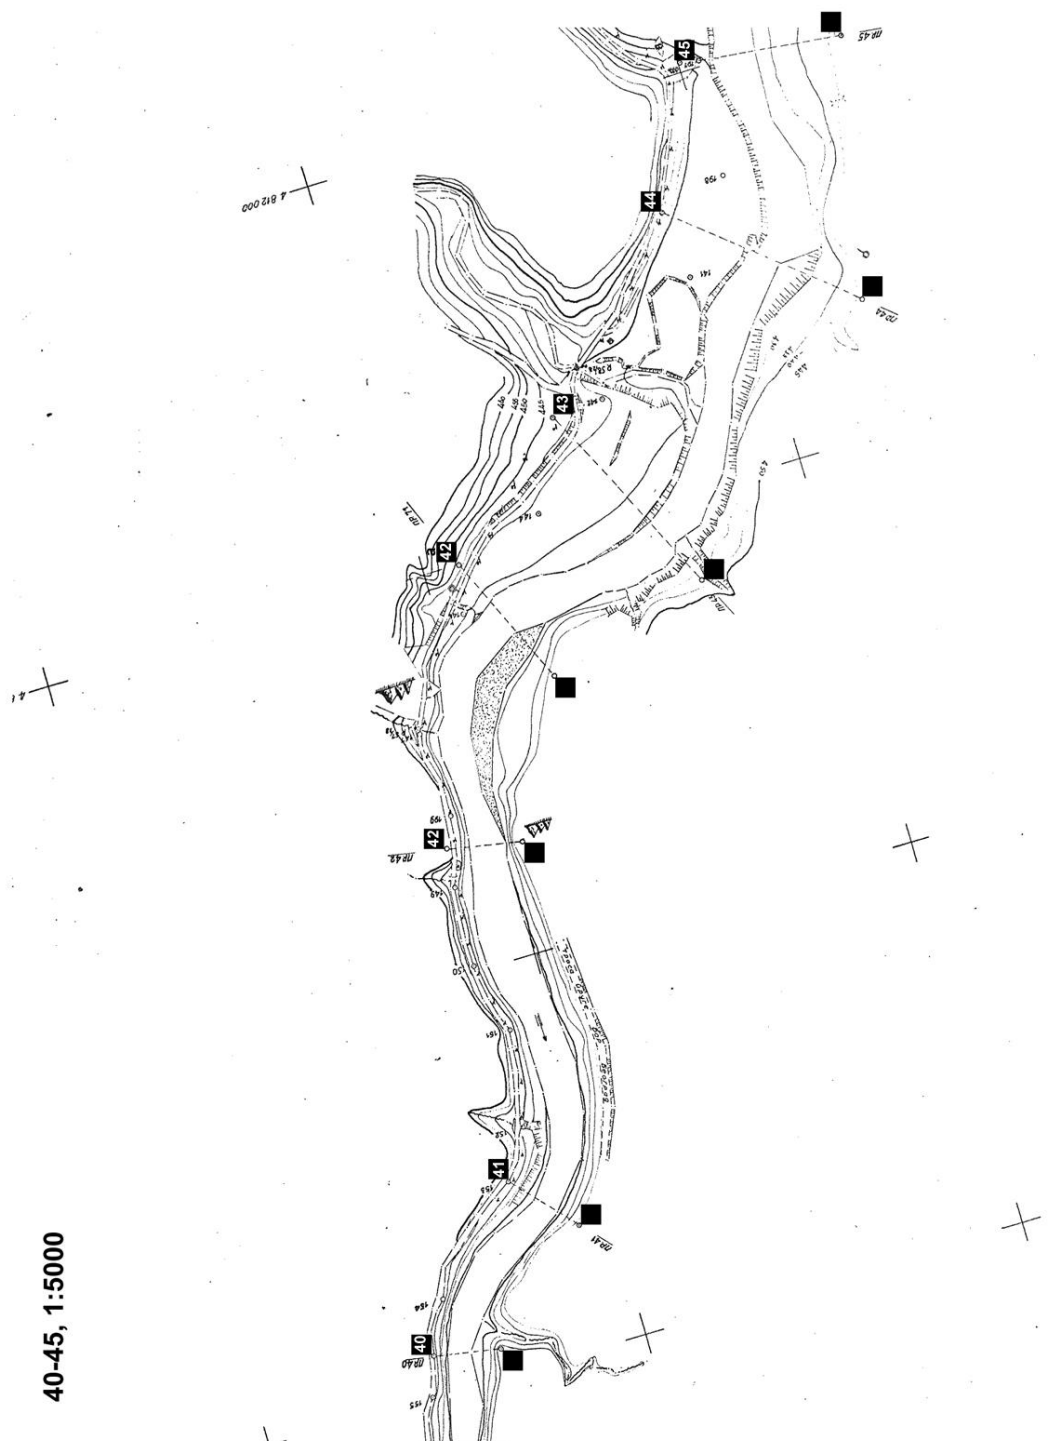



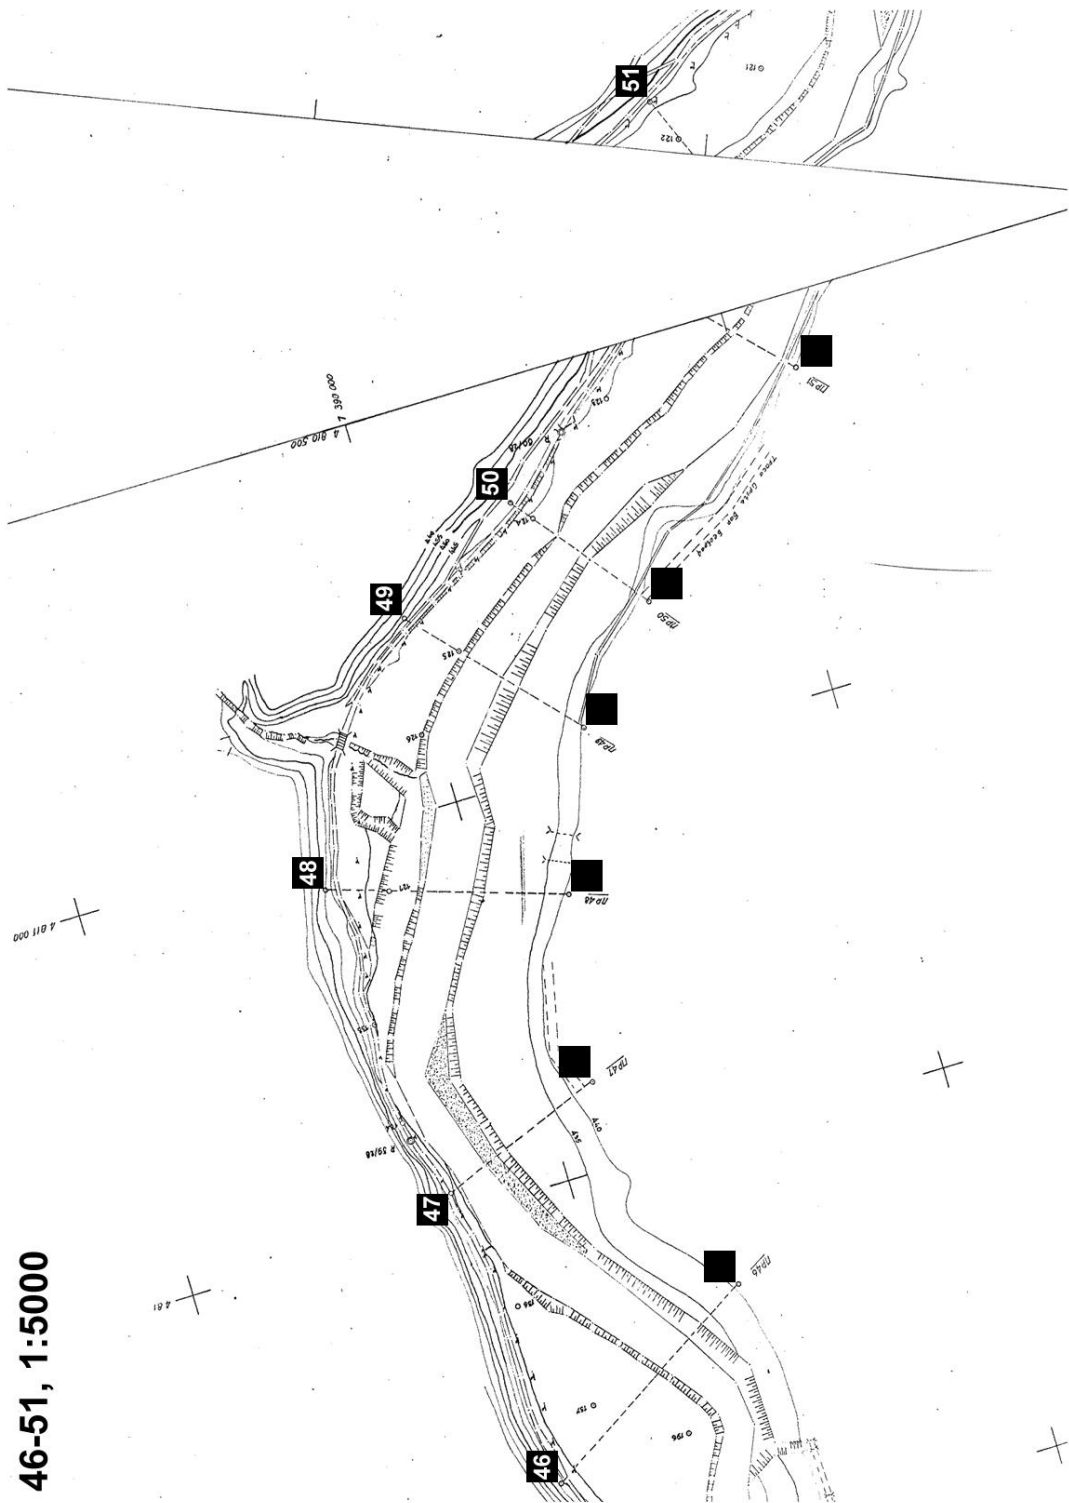

46-51, 1:50000

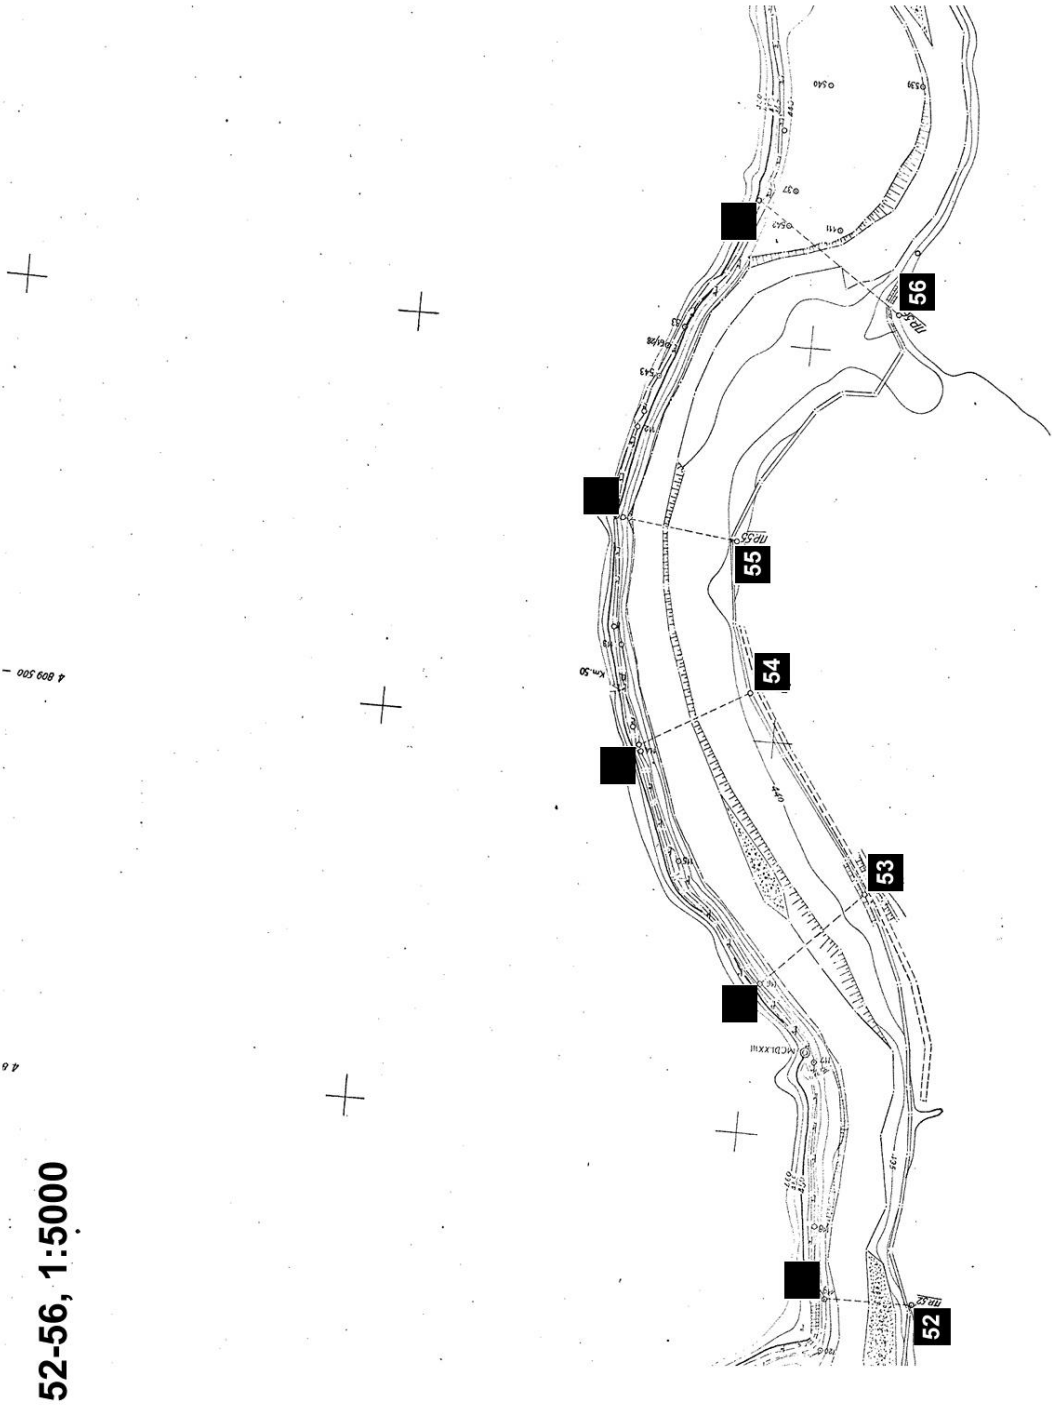

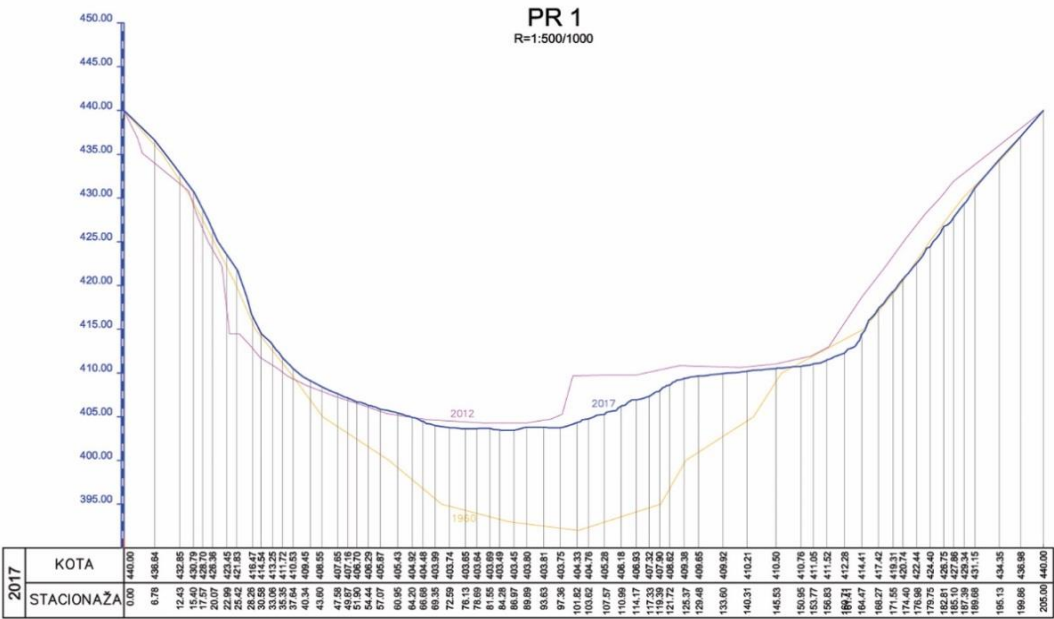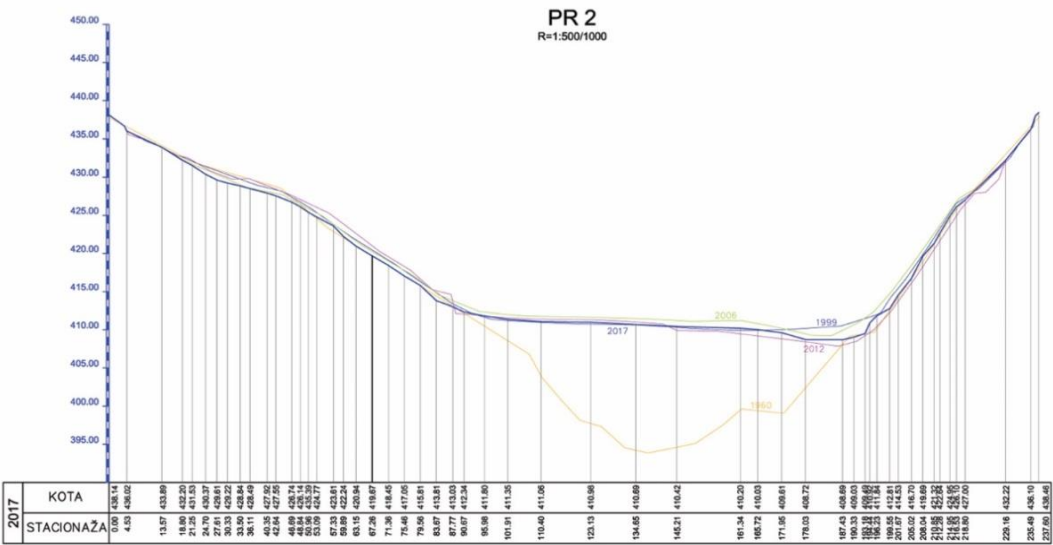

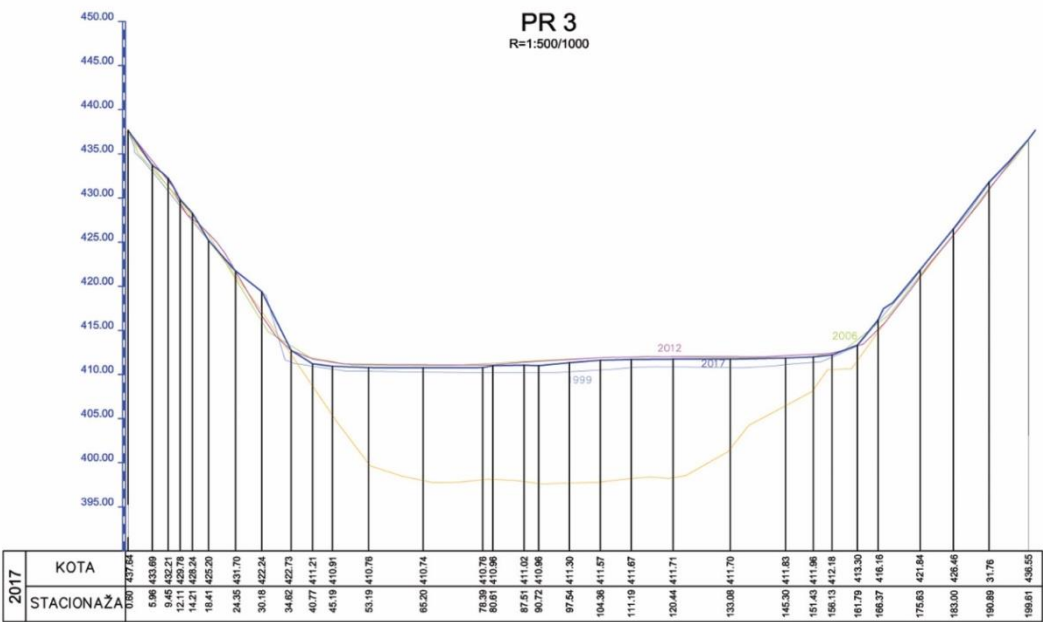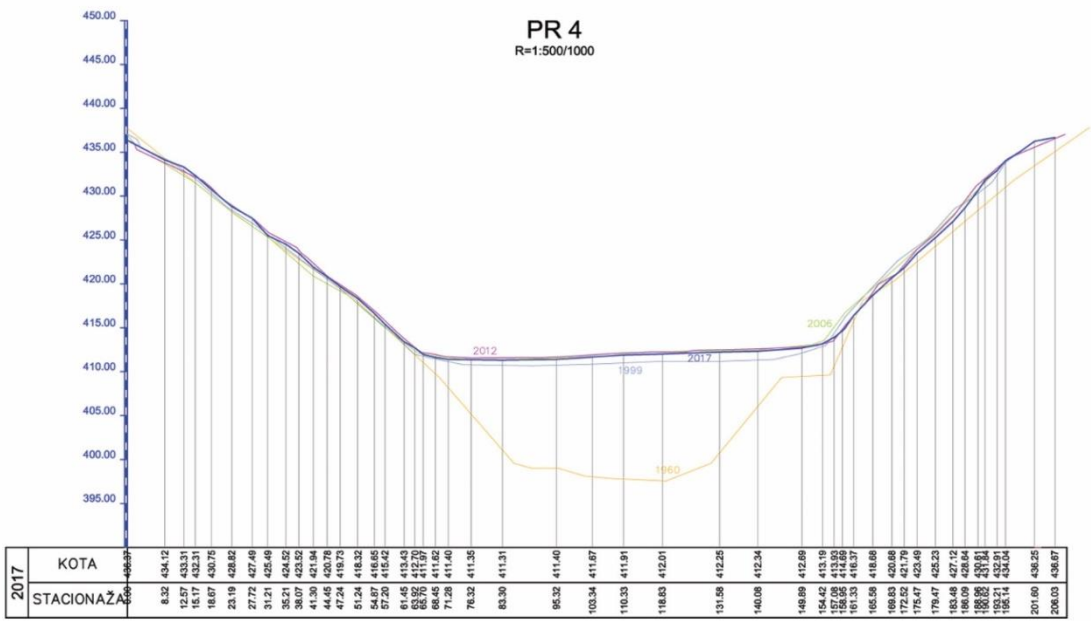

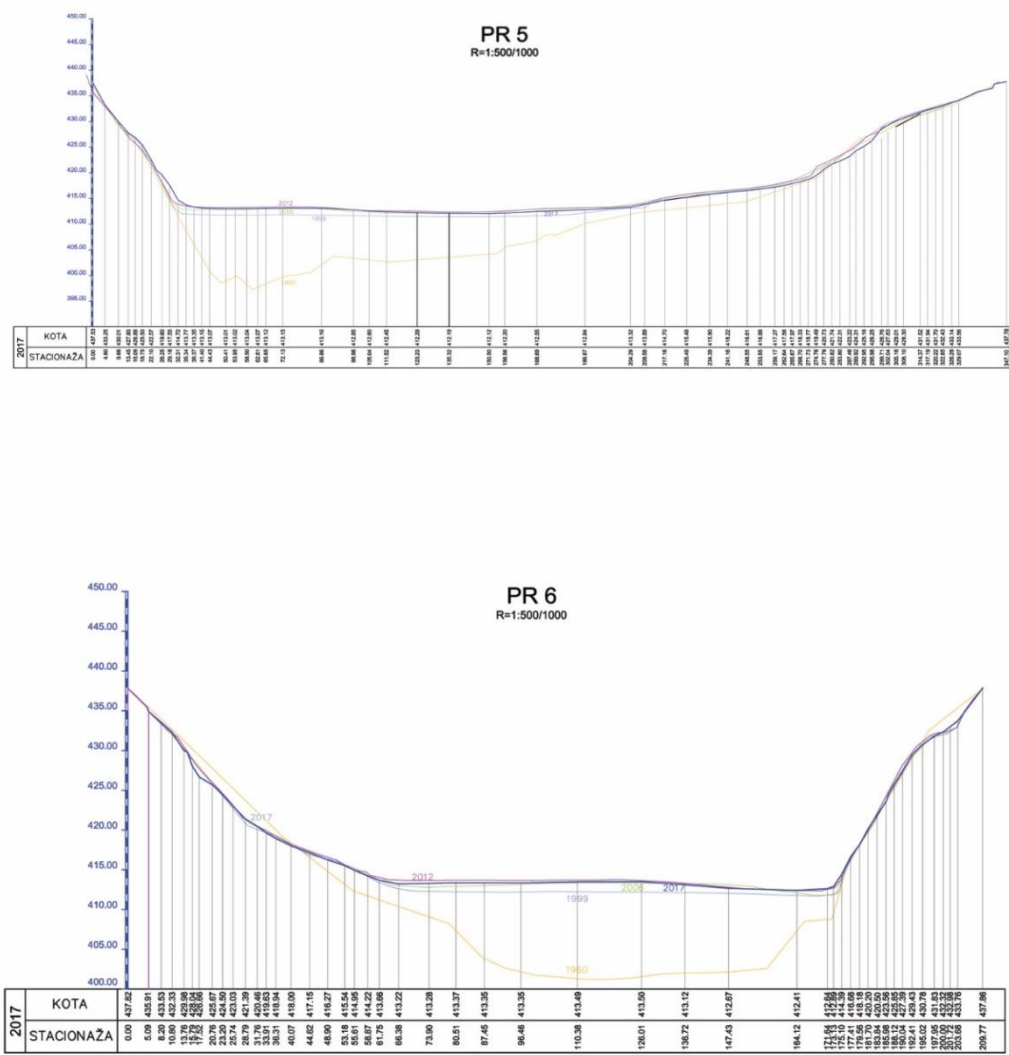

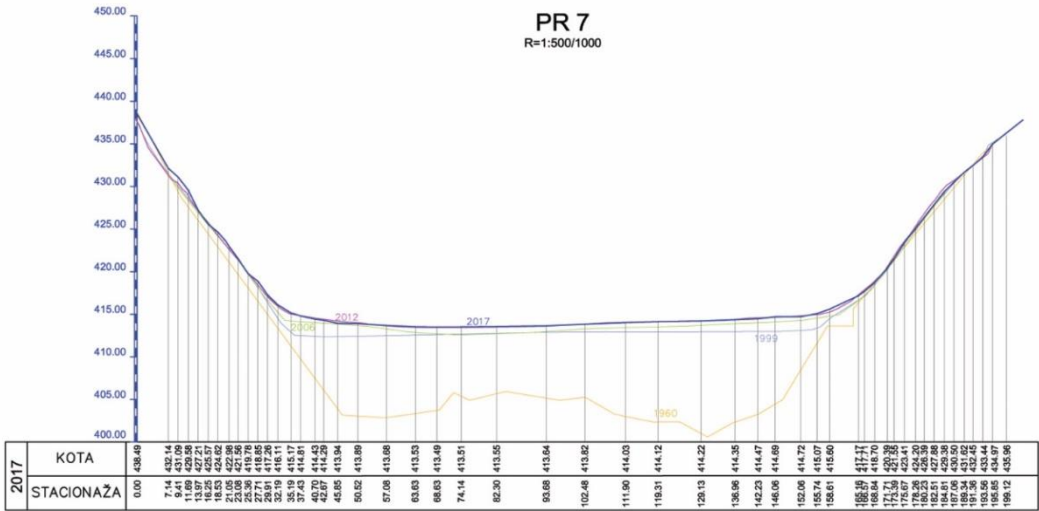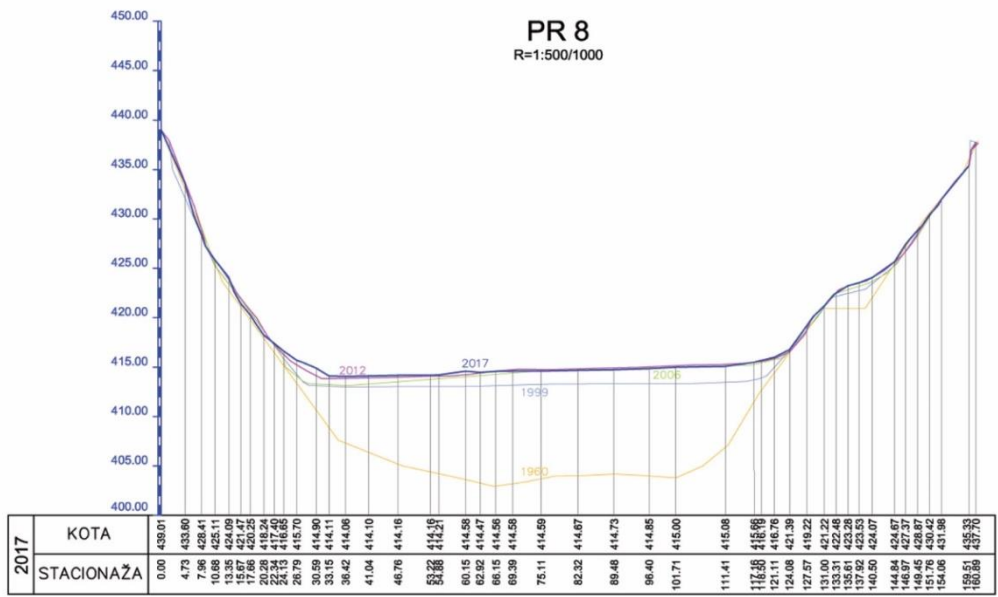

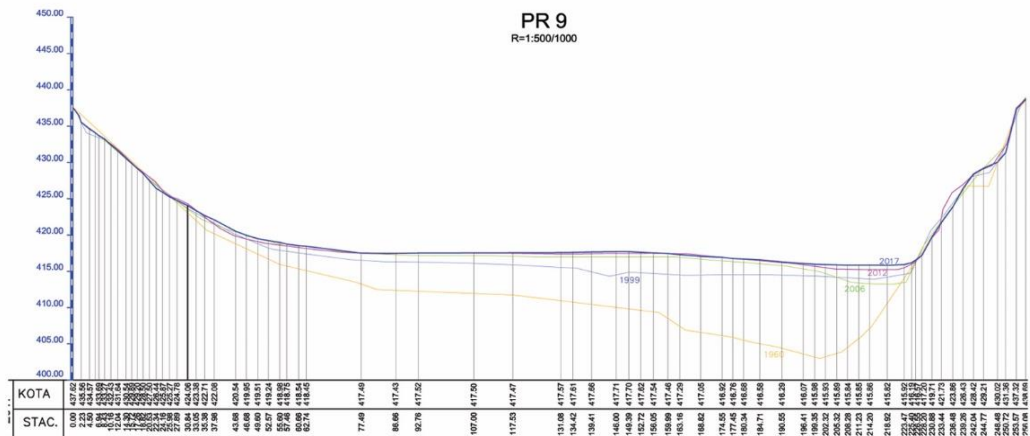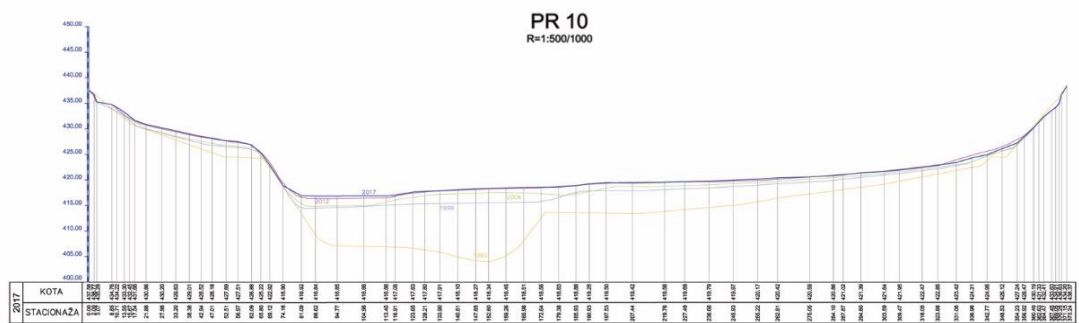

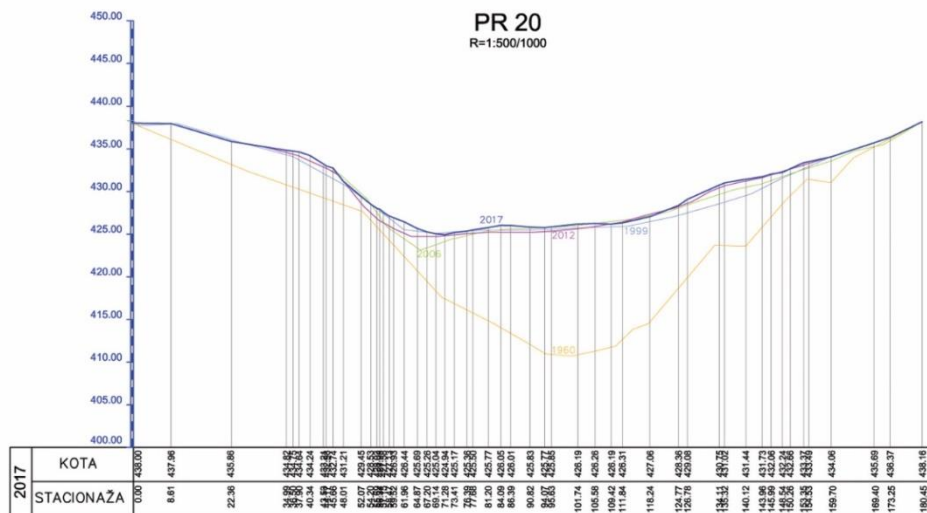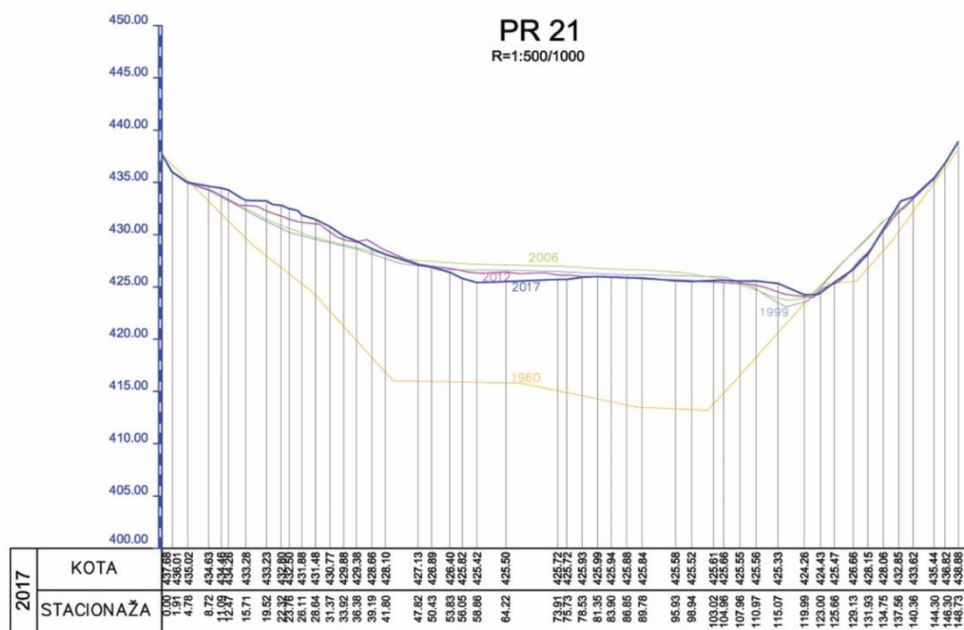



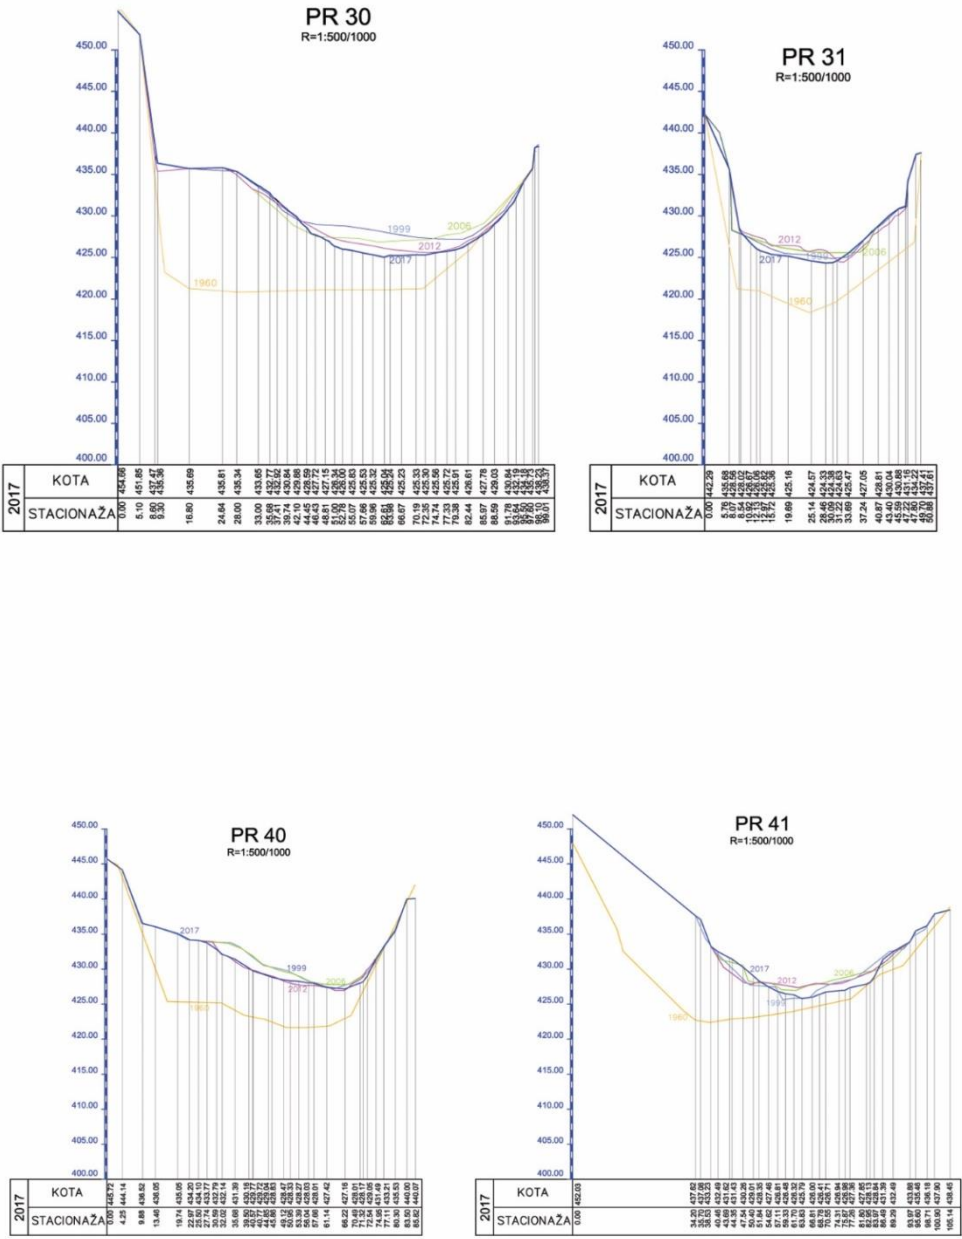

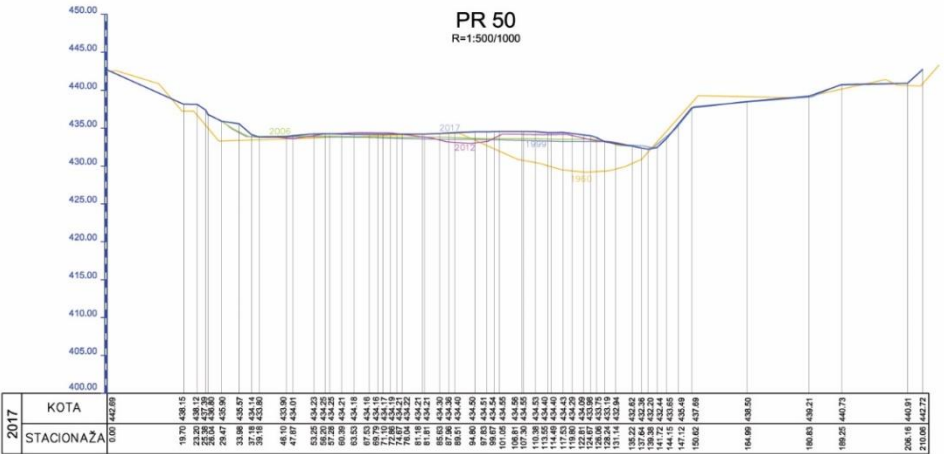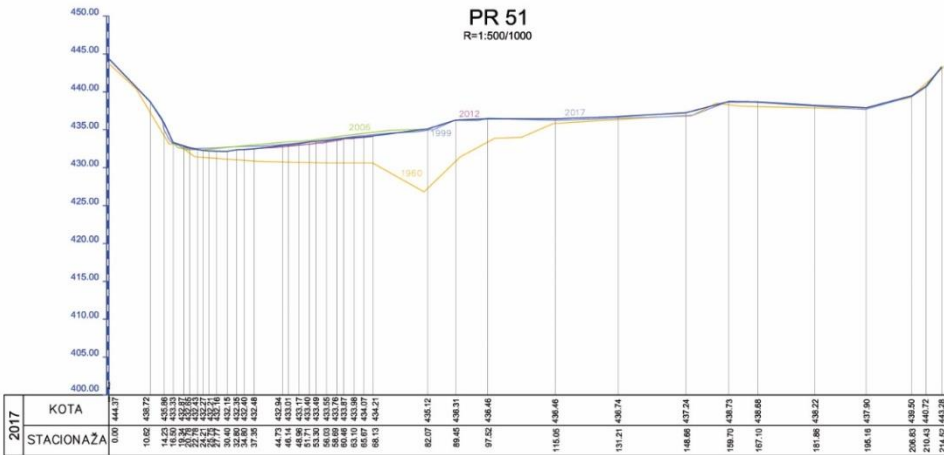

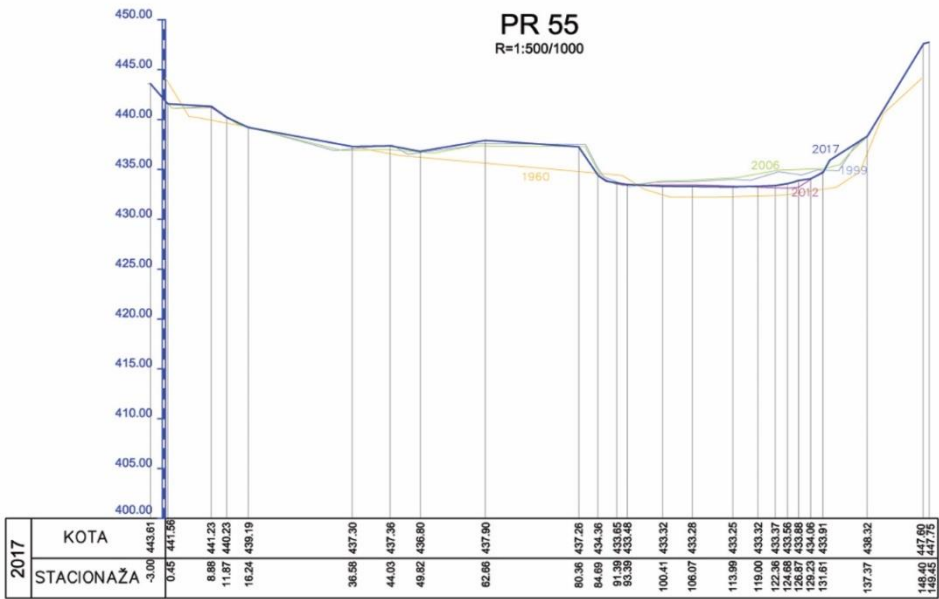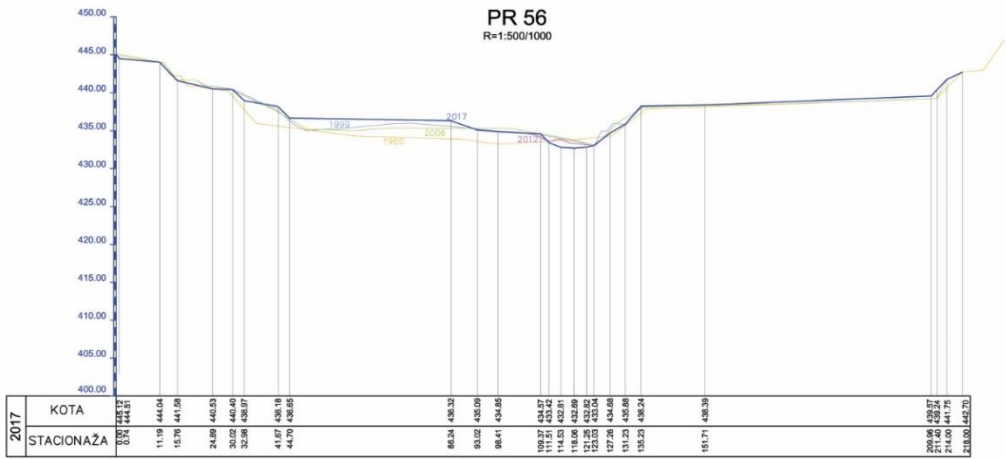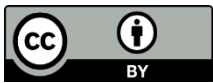

Supplement: s1 [file s1]
